# Supplementary material for: Evidence for gene-environment correlation in child feeding: Links between common genetic variation for BMI in children and parental feeding practices
Source: PLoS Genet. 2018 Nov 20;14(11):e1007757. doi: 10.1371/journal.pgen.1007757 (PMC6245504; doi:10.1371/journal.pgen.1007757)
Supplement: S2 Table — ACE estimates are based on no sex-limitation models. 95% confidence intervals are shown in square brackets. (XLSX) [file pgen.1007757.s003.xlsx]

## Sheet: Sheet1
	MZ males	MZ females	DZ males	DZ females	DZ opposite sex
child BMI SDS	0.84	0.88	0.47	0.55	0.47
	[0.82, 0.85]	[0.87, 0.90]	[0.42, 0.51]	[0.51, 0.59]	[0.44, 0.51]
parental restriction	0.94	0.94	0.69	0.76	0.72
	[0.93, 0.95]	[0.94, 0.95]	[0.66, 0.72]	[0.74, 0.78]	[0.70, 0.74]
parental pressure	0.91	0.9	0.6	0.61	0.68
	[0.90, 0.92]	[0.89, 0.91]	[0.57, 0.64]	[0.57, 0.64]	[0.66, 0.70]
