# Supplementary material for: Evidence for gene-environment correlation in child feeding: Links between common genetic variation for BMI in children and parental feeding practices
Source: PLoS Genet. 2018 Nov 20;14(11):e1007757. doi: 10.1371/journal.pgen.1007757 (PMC6245504; doi:10.1371/journal.pgen.1007757)
Supplement: S5 Table — Descriptive statistics of cleaned phenotypic measures (regressed onto age and sex) in (a) genotyped unrelated individuals, (b) genotyped DZ twins, (c) twins for twin modelling by zygosity. S5A Table: Discrepancies in sample sizes between height and weight and their respective SD scores is due to list wise deletion in the construction of SD scores due to missing age. F = F-statistic of ANOVA. R2 = Variance explained. S5B Table: The sample includes all DZ pairs (same sex and opposite sex); the N includes the total number of individual DZs. Discrepancies in sample sizes between height and weight and their respective SD scores is due to list wise deletion in the construction of SD scores due to missing age. Twin pairs with incomplete data were excluded. F = F-statistic of ANOVA (performed on one randomly selected twin per pair). R2 = Variance explained. S5C Table: Means for phenotypic measures and standard deviations in brackets. MZ = monozygotic; DZ = dizygotic; m = male; f = female; os = opposite sex. Twin pairs with incomplete data and missing information about zygosity were excluded, which explains slight sample size deviations in comparison to unrelated genotyped samples. F-statistics reported for sex, zygosity and sex*zygosity interaction. R2 = variance explained by sex, zygosity and their interaction (ANOVA). All Tables: * = p<0.05; ** = p<0.01; *** = p<0.001. (XLSX) [file pgen.1007757.s006.xlsx]

## Sheet: 5a
							Age effects		Sex effects
	N	Mean	SD	Skew	Min	Max	R2	F	R2	F	Mean M	SD M	Mean F	SD F
Height	4279	-0.01	1	-3.37	-11.89	5.73	<0.01	0	<0.01	0	-0.01	0.89	-0.01	1.09
Height SDS	4228	-0.02	1	0.09	-4.5	3.77	<0.01	0.26	<0.01	0.5	-0.03	0.98	-0.01	1.02
Weight	4306	-0.01	0.99	1.72	-4.36	7.7	<0.01	0.04	<0.01	0.04	-0.01	0.89	-0.01	1.08
Weight SDS	4228	-0.01	1	0.11	-4.02	3.44	<0.01	0	<0.01	0.03	-0.01	0.97	-0.01	1.02
BMI	4228	-0.01	0.99	2.18	-2.03	9.94	<0.01	0.1	<0.01	0	0	0.88	-0.01	1.08
BMI SDS	4228	0	0.99	0.14	-3.67	3.78	<0.01	0.11	<0.01	0.12	0	0.97	-0.01	1.01
Feeding:Pressure	4317	0	0.99	0.41	-1.74	2.86	<0.01	0	<0.01	0.12	0	1.01	-0.01	0.98
Feeding:Restriction	4257	0	1	-0.24	-2.26	1.95	<0.01	0.14	<0.01	0.79	0.01	0.99	-0.01	1.01
Parental BMI	3903	2.97	0.22	0.52	2.14	3.87	-	-	-	-	-	-	-	-

## Sheet: 5b
							Age effects		Sex effects
	N	Mean	SD	Skew	Min	Max	R2	age	R2	F	Mean M	SD M	Mean F	SD F
Height	4160	0.03	1	-3.24	-11.25	5.73	<0.01	0.72	<0.01	0	0.02	1.02	0.02	0.97
Height SDS	4086	0.03	1	0.08	-3.05	3.76	<0.01	0.48	<0.01	1.16	0.06	0.98	0.01	1.01
Weight	4186	0.03	1.02	1.72	-4.36	7.98	<0.01	0.91	<0.01	0.09	0.03	0.96	0.01	1.06
Weight SDS	4086	0.03	1.01	0.1	-4.33	3.61	<0.01	1.17	<0.01	0.18	0.03	0.99	0.01	1.02
BMI	4086	0.02	1.01	2.04	-2.33	8.84	<0.01	0.84	<0.01	0.02	0.01	0.97	0.01	1.05
BMI SDS	4086	0.02	1.01	0.09	-4.17	3.65	<0.01	0.91	<0.01	0.06	0	1.02	0.01	1.03
Feeding:Pressure	4208	0.02	1.01	0.42	-1.74	2.86	<0.01	0.01	<0.01	0.36	-0.01	1.01	0.02	1.02
Feeding:Restriction	4110	0	1	-0.26	-2.26	1.93	<0.01	0.43	<0.01	1.84	-0.03	0.98	0.03	1

## Sheet: 5c
	N	Sample	Mean M	Mean F	MZm	MZf	DZm	DZf	DZos	sex	zygosity	sex x zygosity	R2
		Mean
BMI	8318	-0.00 (0.99)	-0.00 (0.91)	-0.00 (1.06)	-0.03 (0.83)	-0.04 (1.05)	0.02 (0.92)	0.03 (1.08)	0.01 (1.03)	0.48	1.24	0.98	<0.01
BMI SDS	8318	0.00 (1.00)	0.00 (0.99)	-0.00 (1.01)	-0.00 (0.95)	-0.03 (0.99)	0.02 (0.99)	0.02 (1.05)	0.00 (1.01)	0.14	0.22	0.65	<0.01
Pressure	8498	0.00 (1.00)	-0.00 (1.01)	0.00 (0.99)	-0.07 (0.99)	-0.03 (0.97)	0.08 (1.01)	-0.01 (0.99)	0.03 (1.02)	0.04	1.07	1.39	<0.01
Restriction	8332	-0.00 (1.00)	-0.00 (0.99)	0.00 (1.01)	-0.01 (1.00)	-0.03 (1.01)	0.02 (0.98)	-0.00 (1.03)	0.02 (0.99)	0.06	0.36	0.67	<0.01
